# Supplementary material for: Uncertainty and decision-making in Critical Care: lessons from managing COVID-19 ARDS for the next pandemic
Source: Research Square preprint supplement (doi:10.21203/rs.3.rs-4004154/v1), 2024-03-06
Supplement: Supplementary file 1 [file 213e68546db3c754c6767027.docx]

**Uncertainty and decision-making in Critical Care: lessons from managing COVID-19 ARDS for the next pandemic. ONLINE SUPPLEMENT**

**eMethods**

*1.Systematic Review*

A convergent integrated approach was used1. This approach allows all included studies (quantitative, qualitative, mixed method) to be synthesised together using the same method. Extracted data from the quantitative studies and the quantitative component of the mixed method studies were transformed into qualitative data (“qualitising”) and subsequently a meta-ethnography conducted2. This method allows not only the aggregation of existing data but also for new concepts to be developed3.

*1.1**Inclusion Criteria*

Studies exploring human factors that influence decision-making for organ support management of critical care patients were included. Qualitative, quantitative and mixed methods studies were all included.

*1.2 Exclusion criteria*

- Not original research
- Not critical care specific
- Wrong outcome
- Shared decision-making
- Admission or triage decisions
- End of life
- No access
- Not full paper
- Not in English
- Not peer reviewed

*1.3 Search strategy and study selection*

Broad search terms were used to optimise chances of initial inclusion of relevant studies. The initial search identified 6552 unique studies. A forwards and backwards citation search was conducted from 2555 studies that were initially thought to be suitable for inclusion (Figure S1).

Search terms used in PUBMED were ("clinical decision making"[MeSH Terms] OR “clinical decision making” OR “decision making”[Title/abstract]) AND ("critical care"[MeSH Terms] OR “Intensive care units[MeSH Terms] OR “Critical care”[Title/abstract] OR ‘Intensive care units”[Title/abstract] OR “Intensive Care”[Title/abstract]). Search terms used in HDAS were: "(("critical care").ti,ab OR CRITICAL CARE/ OR INTENSIVE CARE UNITS/ OR ("intensive care units").ti,ab OR ("intensive care unit").ti,ab OR ("intensive care").ti,ab) AND (("clinical decision making").ti,ab OR CLINICAL DECISION-MAKING/ OR CLINICAL DECISION-MAKING/ OR DECISION-MAKING/)"

*1.4 Quality assessment*

The Mixed Methods Appraisal Tool (MMAT) was used for quality assessment4. This tool includes two screening questions followed by one of three distinct 5-point checklists for qualitative, quantitative and mixed methods studies. The quantitative and qualitative elements of mixed method studies were further assessed using the quantitative and qualitative checklists, respectively. As proposed, a cut-off score for quality was not set and the MMAT was used as a general guide of study quality. Two reviewers independently scored for inclusion/exclusion with a third reviewer arbitrating as necessary. Studies were excluded if they failed the first two screening questions of the MMAT and/or if there were sufficient concerns around the collection, synthesis or interpretation of the data. Variability in the quality of included studies remained but lower quality papers tended to contribute less to the overall synthesis5.

*1.5 Synthesis, qualitisation and data extraction*

Established themes were compared using reciprocal translation and a “line of argument” synthesis was then conducted to determine how different factors interacted to influence a clinician’s overall decision-making2. The Joanna Briggs Institute methodology was used to qualitise quantitative data1. This was deemed preferable to quantifying qualitative data as it is less error-prone1. Findings from quantitative papers and the quantitative elements from the mixed method studies were initially presented in its numerical format then transformed into textual descriptions. Extracted data was inputted into a common table. The distinction between first order constructs (participants’ descriptions often in the form of quotes) and second order constructs (original authors’ interpretations of the participants’ descriptions) were not clear-cut and therefore were synthesised together6.

*1.6 Translation and translation synthesis*

Quality variability has potential to affect theming, and the five higher quality papers based on the number of participants, methodology used and the MMAT score were themed first4. The remaining 27 papers were subsequently themed, whilst observing for any emergent themes/subthemes. To examine how these different factors interact and develop a higher order interpretation (i.e. a “line of argument”), the translated themes and subthemes were continuously compared against each other alongside the original data. Emerging relationships between the themes/subthemes were merged to form a final line of argument synthesis.

*2. Small group interviews*

5 small group semi-structured interviews were conducted lasting 30-60 minutes. The interviews were recorded and transcribed. It was led by the chief investigator, TM and followed the topic guide outlined below.

**Running order:**

1. Introductions of focus group participants and purpose of focus group (5 minutes)
2. General discussion: (Estimated time: 10-15 minutes) This first part of the discussion is general feelings about ICU during the pandemic and will provide information on the decision-making context
   1. *Please describe your experience of working with COVID-19 patients during the height of the first wave of the pandemic in just one or two words*, *please start with words that describe your experience of the first wave specifically to allow us to distinguish between the two waves.*
      1. [To each participant in turn] *OK, so you said X and Y. Can you tell me more about that?*
   2. *Please describe your experience of working with COVID-19 patients during the height of the second wave of the pandemic in just one or two words*, *please start with words that describe your experience of the first wave specifically to allow us to distinguish between the two waves.*
      1. [To each participant in turn] *OK, so you said X and Y. Can you tell me more about that?*
   3. *What would you say were the differences between your experiences of the first and second waves* (if not already answered)
   4. *Specifically, how do you think all these things we’ve just been talking about affected your decision making during the pandemic?*
   5. *Obviously decision making plays is one of your key roles in ITU, how do you feel all we’ve just talked about influenced your decision-making*
3. *“Lets talk specifically about decisions relating to ventilation and how we managed ventilated patients ”:* 15-20 mins
   1. *What are your thoughts on how you/we made decisions about ventilation for these patients*
      1. How were decisions about ventilatory support being made?
      2. *Who was making the decisions about ventilatory support?*
   2. [If not already mentioned] *Are you aware of any guidelines that were followed?*
      1. *Obviously there are guidelines, like the ARDSnet guidelines for ARDS management. What is your impression of how well they were followed during the pandemic?*
   3. *Do you think there were influences on decision making that we haven’t discussed yet?*
   4. *Obviously, there are data which suggests that there was some variance from normal ideal practice. why do you think that was?*
4. *Specific to ventilation management, can you think of and describe any particularly difficult examples of situations you faced during the pandemic?* (aim for 2 examples at least)

Following transcripton, inductive thematic analyses were manually conducted by three researchers (HM, KM and TS). Each transcript was coded blindly and independently by at least two researchers. The codes were discussed and refined, and subsequently grouped into themes. These codes and themes were validated by the original participants to ensure they were representative of the interviews

**eResults**

*1.Systematic Review*

- 1. *Screening*

Following the initial screening, 6445 papers were excluded based on our exclusion criteria and 106 progressed to abstract screening. Abstracts were screened based on the same inclusion and exclusion criteria as the initial screening and 106 studies were then assessed for quality. The PRISMA flowchart summarises the process in figure S1.

*
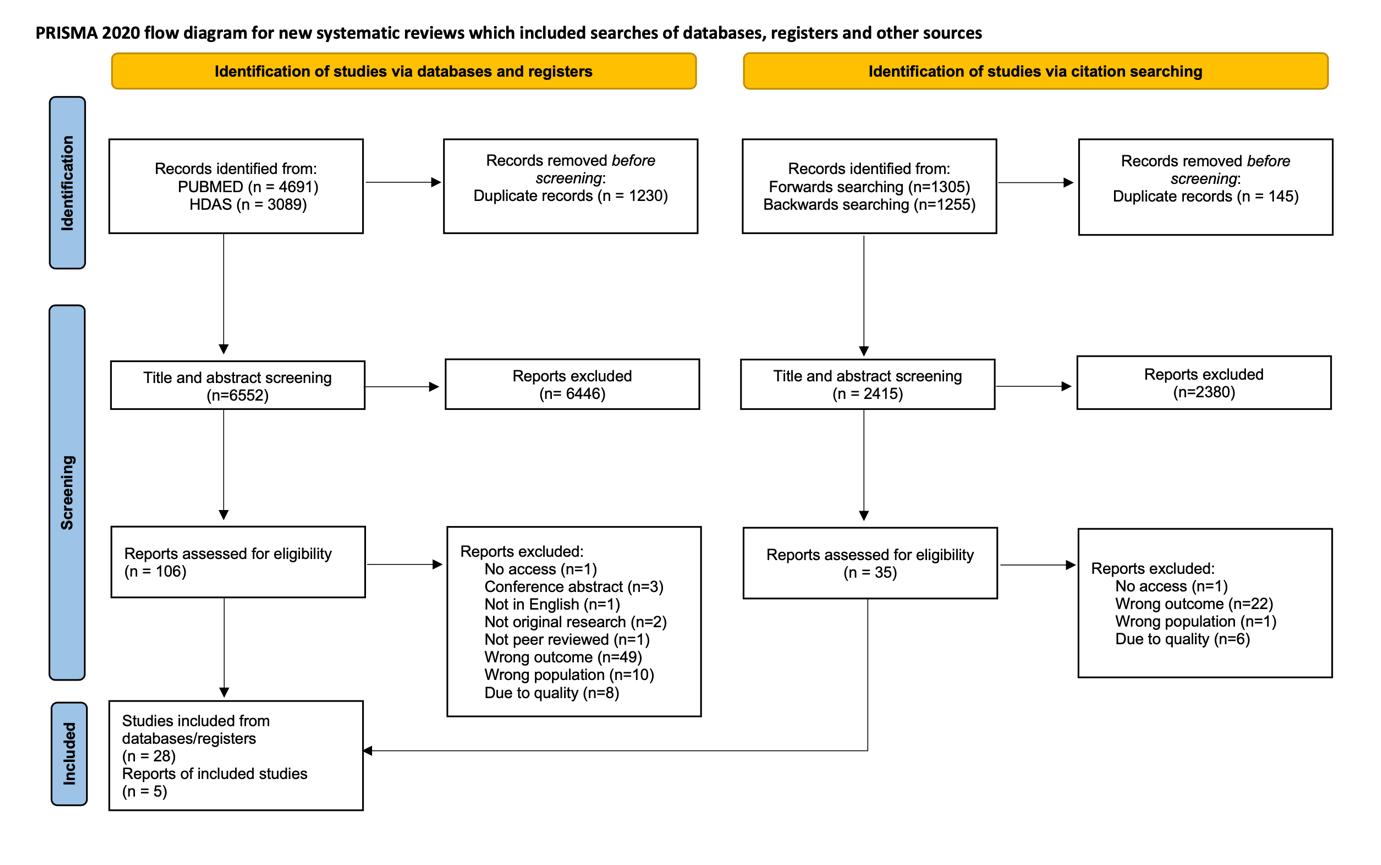
*

Figure S1: PRISMA flow diagram for the systematic review

- 1. *Included papers*

Of the 33 included studies, 13 concerned decision-making around ventilation and/or weaning with 20 focussed on haemodynamic management, sedation, enteral feeding and general bedside decision-making (not Covid19-ARDS related; Table S1). The studies predominantly explored influences on routine bedside critical care decision-making and the majority of studies (21 out of 33) investigated decision-making in exclusively nurses.

| **Title** | **Authors** | **Year** | **Professionals** | **Type of study** | **Decision** |
| --- | --- | --- | --- | --- | --- |
| Challenges and barriers to optimising sedation in intensive care: a qualitative study in eight Scottish intensive care units. | Kydonaki et al. | 2019 | Doctors, nurses and physios | Qualitative | Sedation |
| Clinical decision-making and mechanical ventilation in patients with respiratory failure due to an exacerbation of COPD. | Perrin et al | 2003 | Doctors | Quantitative | Ventilation and/or weaning |
| The clinical landscape of critical care: nurses' decision-making. | Bucknall | 2003 | Nurses | Qualitative | Bedside |
| An observational study of decision making by medical intensivists | McKenzie et al. | 2015 | Doctors | Quantitative | Bedside |
| Difficult to wean patients: cultural factors and their impact on weaning decision-making. | Kydonaki et al. | 2014 | Doctors and Nurses | Qualitative | Ventilation and/or weaning |
| Nurse decision making regarding the use of analgesics and sedatives in the pediatric cardiac ICU. | Staveski et al. | 2014 | Nurses | Qualitative | Sedation |
| Mechanical Ventilation, Weaning Practices, and Decision Making in European PICUs. | Tume et al. | 2017 | Doctors and Nurses | Quantitative | Ventilation and/or weaning |
| Factors influencing decision making in neonatology: inhaled nitric oxide in preterm infants. | Manja et al. | 2019 | Doctors | Mixed | Haemodynamic management |
| Dual agency in critical care nursing: Balancing responsibilities towards colleagues and patients. | Trapani et al. | 2016 | Nurses | Qualitative | Bedside |
| Expert clinical reasoning and pain assessment in mechanically ventilated patients: A descriptive study | Gerber et al. | 2015 | Nurses | Qualitative | Sedation |
| A study exploring factors which influence the decision to commence nurse-led weaning. | Gelsthorpe et al. | 2004 | Nurses | Qualitative | Ventilation and/or weaning |
| Protocolized weaning from mechanical ventilation: ICU physicians' views. | Blackwood et al. | 2004 | Doctors | Qualitative | Ventilation and/or weaning |
| Strategies and criteria for clinical decision making in critical care nurses: a qualitative study. | Ramezani-Badr et al. | 2009 | Nurses | Qualitative | Bedside |
| The factors which influence nurses when weaning patients from mechanical ventilation: findings from a qualitative study. | Lavelle et al. | 2011 | Nurses | Qualitative | Ventilation and/or weaning |
| Understanding nurses' decision-making when managing weaning from mechanical ventilation: a study of novice and experienced critical care nurses in Scotland and Greece. | Kydonaki et al. | 2016 | Nurses | Qualitative | Ventilation and/or weaning |
| The level of knowledge of respiratory physiology articulated by intensive care nurses to provide rationale for their clinical decision-making. | Pirret AM | 2007 | Nurses | Mixed | Ventilation and/or weaning |
| Critical care nurses' use of decision-making strategies. | Aitken LM | 2003 | Nurses | Qualitative | Haemodynamic management |
| Making decisions about medications in critically ill children: a survey of Canadian pediatric critical care clinicians. | Duffett et al. | 2015 | Doctors | Quantitative | Bedside |
| Ethical aspects of time in intensive care decision making. | Seidlein et al. | 2020 | Doctors and nurses | Qualitative | Bedside |
| Weaning from mechanical ventilation: factors that influence intensive care nurses' decision-making. | Tingsvik et al. | 2015 | Nurses | Qualitative | Ventilation and/or weaning |
| Nurses' near-decision-making process of postoperative patients' cardiosurgical weaning and extubation in an Italian environment. | Villa et al. | 2012 | Nurses | Qualitative | Ventilation and/or weaning |
| A comparison of novice and expert nurses' cue collection during clinical decision-making: verbal protocol analysis. | Hoffman et al. | 2009 | Nurses | Qualitative | Haemodynamic management |
| Preferred information sources for clinical decision making: critical care nurses' perceptions of information accessibility and usefulness. | Marshall et al. | 2011 | Nurses | Qualitative | Enteral feeding |
| A qualitative analysis of how advanced practice nurses use clinical decision support systems. | Weber S | 2007 | Nurses | Qualitative | Bedside |
| Why are physical restraints still in use? A qualitative descriptive study from Chinese critical care clinicians' perspectives | Cui N | 2021 | Doctors and nurses | Qualitative | Ventilation and/or weaning |
| Factors influencing nurse sedation practices with mechanically ventilated patients: a U.S. national survey | Guttormson | 2010 | Doctors | Quantitative | Sedation |
| Nurse staffing and unplanned extubation in the pediatric intensive care unit | Marcin | 2005 | Nurses | Quantitative | Ventilation and/or weaning |
| Experiences of intensive care nursesassessing sedation/agitation incritically ill patients | Weir | 2008 | Nurses | Qualitative | Sedation |
| The decision-making processes of nurses when extubating patients following cardiac surgery: an ethnographic study. | Hancock HC et al. | 2006 | Nurses | Qualitative | Ventilation and/or weaning |
| Clinical credibility and trustworthiness are key characteristics used to identify colleagues from whom to seek information | Marshall | 2013 | Nurses | Qualitative | Enteral feeding |
| The influence of patient complexity and nurses' experience on haemodynamic decision-making following cardiac surgery. | Currey et al. | 2006 | Nurses | Qualitative | Haemodynamic management |
| Intuition and the development of expertise in surgical ward and intensive care nurses. | King et al. | 2002 | Nurses | Qualitative | Bedside |
| ICU physician-based determinants of life-sustaining therapy during nights and weekends: French multicenter study from the Outcomerea Research Group. | Garrouste-Orgeas M et al. | 2014 | Doctors | Quantitative | Bedside |

Table S1. Table highlighting the included studies in the systematic review, the professionals included in each study, the type of study and the decisions being assessed

*1.3* Themes and subthemes

Thematic analysis led to the generation of 20 subthemes that were eventually collapsed into 11 subthemes under four broader themes: human, team, system and disease factors (Table S2).

| **Main theme** | **Subtheme** | **Description** |
| --- | --- | --- |
| Individual | Clinician’s experience | Experience alters a clinician’s approach to assimilating and processing clinical information. Those with more experience are more adept at using cues/abstract information and use heuristics/pattern recognition. |
| Professional and personal risk | The perception of professional/personal risk negatively impacts a clinician’s decision-making (*e.g.* clinicians may choose to spread risk and/or practise defensive medicine). |
| Uncertainty | The perception of uncertainty negatively impacts clinical decision-making. Clinicians may, for example, “freeze” and ultimately delay decision making |
| Characteristics of clinician | Characteristics of the clinician such as personality, education, age, specialty and gender often influence their decision-making. |
| Team | Support | Senior support and formal education optimise clinical decision-making. They help clinicians (especially those who are inexperienced) respond earlier and more appropriately, and give credibility to their decision-making. |
| Dependence on colleagues | Communication and prior decisions made by colleagues impact subsequent clinical decisions (often negatively). Non-timely extubations, for example, may lead to increased use of physical restraints or increase sedation time. |
| Team hierarchy | Rigid hierarchies can lead to clinicians at the bottom of the hierarchy to have less autonomy for their decision-making, whereas collaborative teams increase it. |
| System | Evidence/Guidelines/Protocols | Protocols and guidelines help clinical decision-making in certain situations by reducing variability and uncertainty. However, they are often rigid and not customisable to the specific decision. |
| Time/workload | Workload and time constraints influence the practicalities of certain decisions. Sedation delays may occur, for example, for pragmatic reasons rather than clinical ones. |
| Hospital structure | The set-up of the critical care unit (size, bed space), budgetary constraints and pressure from management also influence the practicalities of certain decisions. |
| Disease | Clinical condition | The patient’s clinical condition (co-morbidities, observations, biomarkers) influences the clinical scenario and thereby the clinician’s decision-making. It is often the most important factor. There is also pressure from families and consideration of equity. |

Table S2 Themes and subthemes developed from the systematic review

*2. Local focus group themes*

After refinement, there were 21 codes that were broadly categorised into 5 distinct themes that influenced decision-making. In order of most to least frequently coded, these were: disease factors, contextual factors, team factors as a negative influence, team factors as a positive influence, and environmental factors

| *1* | ***Disease factors influencing decision making*** | ***n*** |
| --- | --- | --- |
|  | Previous mental models / ARDSnet guidelines didn't always fit well to COVID-19 patients | 39 |
|  | Unfamiliarity with or novelty of COVID pathophysiology | 14 |
|  | Fear of active decisions worsening outcomes when facing uncertainty | 8 |
|  | Lack of consensus about ventilation strategies | 5 |
|  | *Representative quotes: “It wasn’t just about the number of patients, it was about a whole new disease.”*  *“It’s interesting isn’t it, the more we speak to each other the more we realise that we were all kind of flailing around in the dark and doing what we could”* |  |
| *2* | ***Contextual factors influencing decision making*** |  |
|  | Decision making impacted by cognitive overload | 19 |
|  | Ability to action decisions limited by human and physical resources (forced more conservative decision-making) | 18 |
|  | Feeling powerless to alter the patients’ trajectory (clinical impotence) | 5 |
|  | Desensitisation to the acuity of patients | 3 |
|  | *Representative quote: “If you tried to do something you could potentially make them worse. If they were okay you wouldn’t change things. We became very conservative…The thing is as well, if you make a decision, you want to be able to come back and re-evaluate it, if you think that’s going to be impossible then I’m not necessarily going to [change anything]. Or, if the nurse at the bedside is not able to monitor the intervention then you end up making a lot less decisions.”* |  |
| *3* | ***Team factors with a positive influence*** |  |
|  | Strong team work / team spirit made decision making easier | 10 |
|  | Sharing and triangulating mental models (between consultants) was helpful | 6 |
|  | Team-based (distributed) decision making (cons, juniors, nurses together) | 5 |
|  | The clinical experience of the team | 1 |
|  | Recognition of / adaptation to crisis situation | 1 |
|  | *Representative quote: “There were also the Monday, Wednesday and Friday clinical decision meetings where we discussed anyone who we felt were at a bit of an impasse with, whether it was to tube or not, or withdraw etc. to be able to get a consensus…They became more frequent during the waves, normally they’re just a Monday”* |  |
| *4* | ***Team factors with a negative influence*** |  |
|  | Lack of experience of the team making ventilation decisions (e.g. redeployed staff) | 14 |
|  | Unfamiliarity (even for intensivists) with managing very sick ARDS patients (normal times) | 6 |
|  | Poor training on ARDSNet guidance / protocol | 5 |
|  | Poor communication of decisions made (from doctors to nurses) | 1 |
|  | *Representative quote: I think I found that once we were making protocols, checklists and procedures for COVID we realised we had to cut it down as we had an inexperienced nursing and medical team so we had to make the most of what we’ve got.* |  |
| *5* | ***Decision making influenced by environmental factors (esp. patient location and vents)*** |  |
|  | Unfamiliarity with multiple different ventilators | 5 |
|  | Ward layout and patient location (barriers to contact / PPE) | 2 |
|  | Working patterns affecting decisions (i.e. fatigue negatively / getting to know the patient positively) | 1 |
|  | *Representative quote: “…there was a lot of unfamiliarity with different ventilators. All of that comes into it. It’s often hard to get things done well on one ventilator with a trained workforce, so this isn’t that surprising is it, under these circumstances…”* |  |
| *6* | ***Other*** |  |
|  | Effects of own COVID-19 recovery on decision-making | 1 |

Table S3 Themes and subthemes developed from the small group semi-structured interviews

# **Version of Full Questionnaire**

# ICU Ventilation Decision Making during the COVID-19 pandemic

**1. Participant Information Sheet**

You are being invited to participate in our research study titled "Understanding and improving ventilation-based decision making during the COVID-19 pandemic". We are particularly interested in exploring the factors that may have influenced decision-making during the first and second wave of the COVID-19 pandemic, in particular in relation to mechanical ventilation and ARDS management. If you would like more background information on our research, you will find this at: files.smartsurvey.io/2/0/KXPG5ZH2/B.pdf

If you decide to participate, you will be asked to complete this questionnaire. In this questionnaire, we will ask you for some basic information. This information will include your role, grade, country you work in and the timeframe for which you worked in intensive care. We will not be asking for any personal data and the individual responses will only be accessible to the researchers working on this study. We will ask a series of questions asking what factors would have led to your decision making.

**Who is eligible to participate in this questionnaire?**

Please fill out this questionnaire if you are:

A healthcare professional

Worked in intensive care for more than a week between March 2020 to March 2021

**Do I have to take part?**

This participant information sheet has been written to help you decide if you would like to take part. It is up to you whether you wish to take part. If you do decide to take part you will be free to withdraw at any time without needing to provide a reason, and with no penalties or detrimental effects.

**What are the possible benefits of taking part?**

You will be contributing to research that will have the potential to save the lives of people in the event of any future healthcare emergencies

**What are the possible disadvantages and risks of taking part?**

We recognise that recounting experiences of the COVID-19 pandemic may be difficult. If you believe that this subject matter will cause you undue distress, please refrain from participating in this questionnaire.

**Expenses and payments**

None

**When and how will my data be destroyed?**

Your data will be stored for 5 years from the end of the study and then destroyed.

**How will my data be used and shared?**

Your data will contribute to new research findings but your individual contribution will be used in a way that means you would not be identifiable in any way. Dissemination of these findings will include academic research publications, conference presentations, network and association newsletters, media releases where appropriate.

**Under what legal basis are you collecting this information?**

We will not be collecting any personal data for this project.

**What will happen if I want to withdraw from this study?**

As your responses are anonymised, once you complete the questionnaire you will not be able to remove your answers from this study. However, you may withdraw at any point before the questionnaire is completed.

**What should I do if I have any concerns about this study?**

If you have any concerns about the manner in which the study was conducted, in the first instance, please contact the researcher responsible for the study. If you have a complaint which you feel you cannot discuss with the researchers then you should contact the Research Ethics Facilitators by e-mail: research-ethics@qmul.ac.uk. When contacting the Research Ethics Facilitators, please provide details of the study title, description of the study and QMERC reference number (where possible), the researcher(s) involved, and details of the complaint you wish to make.

**Who can I contact if I have any questions about this study?**

Tim Stephens

Critical Care and Peri-operative Medicine Research Group

Queen Mary, University of London

Email: t.t.stephens@qmul.ac.uk

Tel: 0203 594 0348

**1. I confirm that I have read and understood the above information ***

Yes/No

**2. I agree to take part in this study ***

Yes/No

**2. Basic Demographic Questions**

Please complete the following questions as appropriate, you may respond *‘prefer not to say’* for any questions

**3. What is your age? ***

**4. What is your gender?**

Male

Female

Non-binary

Prefer not to answer

Not listed above (please specify):

**5. Which professional group do you belong to? ***

Doctor

Nurse

Physio

Respiratory care therapist

Other (please specify):

**3. Job title - doctor**

**6. What level of seniority were you between March 2020 to March 2021? ***

Foundation Year

Core Training

ST3-4

ST5+

Consultant

Junior Clinical Fellow

Senior Clinical Fellow

Specialty Doctor / Staff Grade

Associate Specialist / Specialist

Other (please specify):

**4. Job title - nurse**

**7. What is your Afc band? ***

5

6

7

8a

Other (please specify):

**5. Job title - physio**

**8. What is your Afc Band ***

5

6

7

8a

Other (please specify):

**6. Job title – (if not doctor/nurse/physio)**

**9. Please specify your role and title**

**7. When/where did you work**

**10. Prior to March 2020, how many years of experience did you have working in Intensive Care? ***

0

<1

2

3

4

5-9

10+

Comments:

**11. I worked in intensive care for more than 1 week in this period (You can check more than one box) ***

March to June 2020 (Wave 1)

July 2020 to October 2020 (between wave 1 and 2)

November 2020 to March 2021 (Wave 2)

**12. Where did you work during the first wave of the COVID-19 pandemic? ***

**13. Where did you work during the second wave of the COVID-19 pandemic? ***

**8. Baseline Questions 1**

Please answer the following questions based on your experience of **critically ill patients** with **ARDS prior to March 2020** (i.e. prior to the COVID-19 pandemic)

**14. How much knowledge/experience of non-COVID-19 ARDS did you have? ***

**Knowledge:** A lot/Some/Only a little/None

**Experience:** A lot/Some/Only a little/None

**15. How much knowledge/experience of managing viral pneumonia did you have? ***

**Knowledge:** A lot/Some/Only a little/None

**Experience:** A lot/Some/Only a little/None

**16. Were you aware of existing national and/or local guidelines/protocols for managing non-COVID 19 ARDS? ***

**National guidelines/protocols:** Aware and knew the contents/Aware but didn’t know the content/Was not sure they existed/They did not exist

**Local guidelines/protocols:** Aware and knew the contents/Aware but didn’t know the content/Was not sure they existed/They did not exist

**17. How adherent were you to the national and/or ARDS management guidelines/protocols prior to March 2020? (You may answer N/A if either you had no experience of managing ARDS or you were not aware of the content/existence of these guidelines/protocols) ***

**National guidelines/protocols:** Very adherent/Adherent/Somewhat adherent/Rarely adherent/Never adherent/NA

**Local guidelines/protocols:** Very adherent/Adherent/Somewhat adherent/Rarely adherent/Never adherent/NA

**18. If you have any further comments on any of your answers on this section, please state these below:**

**9. Baseline Questions 2**

Please rate the following statements on a scale of 1 to 10 with **1 being strongly disagree** and **10 being strongly agree**. Answer based on the knowledge and experience you had encountering **critically ill** COVID-19 patients with **severe respiratory failure i**n intensive care **between March 2020 to March 2021**.

19. Patients were presenting in ways that were consistent with my previous knowledge/experience of non-COVID-19 ARDS


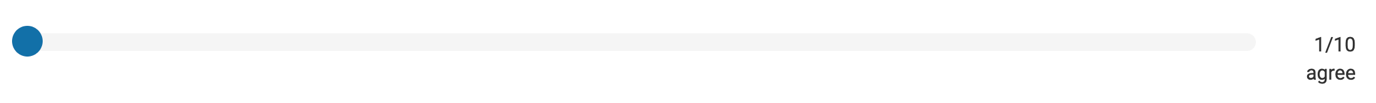


20. The disease course was similar to my previous experience/knowledge of other viral pneumonias


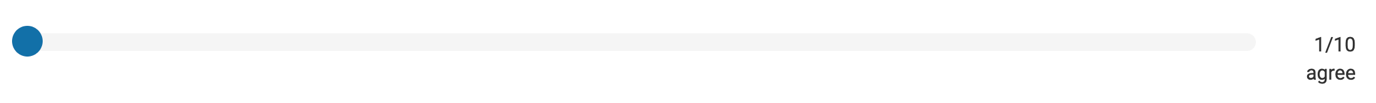


21. The existing guidelines/protocols for managing non-COVID-19 ARDS was applicable to this situation


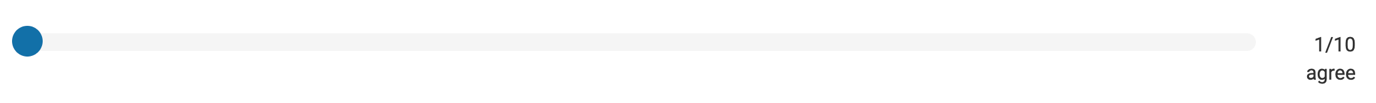


22. Patients were presenting in ways that required more deviation from the ARDS management guidelines compared to my usual practice of non-COVID-19 ARDS


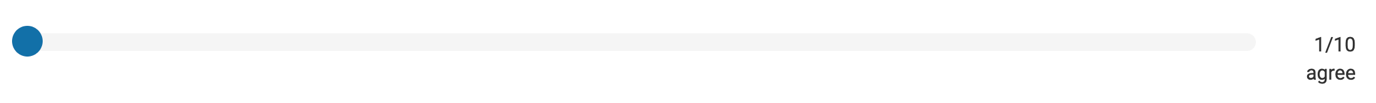


23. Patients were presenting in ways that meant using non-standard ventilatory strategies was necessary


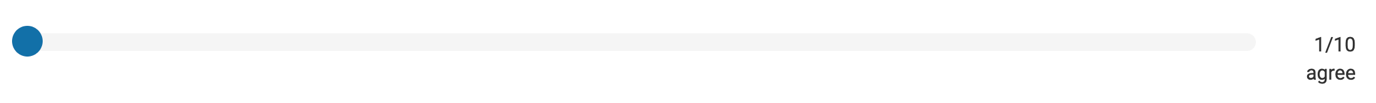


24. Patients were presenting in ways that meant using non-standard ventilatory strategies could improve patient outcome


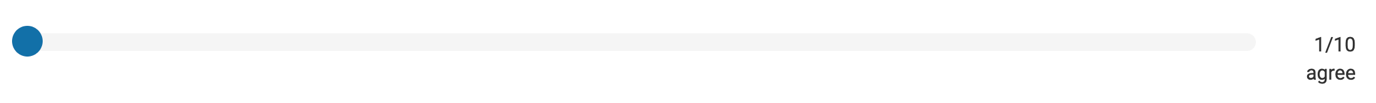


25. If you have any further comments on any of your answers on this section, please state these below:

**10. Confidence questions**

Please rate the following statements on a scale of 1 to 10 with **1 being strongly disagree** and **10 being strongly agree**. Answer based on the experience you had encountering critically ill COVID-19 patients with severe respiratory failure in intensive care between March 2020 to March 2021.

26. I was confident that I had sufficient knowledge/experience to treat COVID-19 ARDS


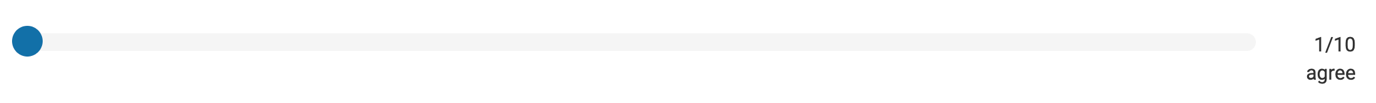


27. I was confident that my ventilatory strategy for COVID-19 ARDS would improve patient outcome


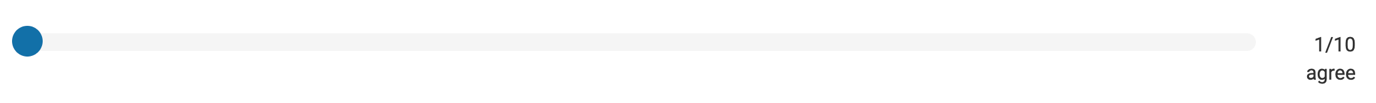


28. If you have any further comments on any of the answers on this section, please state this below:

**11. Information about the subsequent sections**

**This is the final section of the questionnaire, which should take less than 5 minutes to complete**

From our focus groups, we identified factors that influenced clinical decision making around ventilation strategy for critically ill patients with COVID-19 ARDS.

We then broadly categorized these factors into four overarching themes:

1. Team factors

2. Environmental factors

3. Disease factors

4. Contextual factors

Each theme is made up of at least three subthemes. In the next section, we would like you to compare the different subthemes within a theme and rank them in order of the most to least influential in your decision making for critically ill patients with COVID-19 ARDS.

**Please base this on your experience at the time when you encountered critically ill Covid-19 patients between March 2020 to March 2021**

**12. Disease factors**

**The following subthemes pertain to "Disease factors"**

**29. Rank the following statements in order of its influence on your decision making: ***

- Fear that making an active decision would worsen outcomes when facing uncertainty
- Lack of consensus about ventilation strategies
- Unfamiliarity with COVID pathophysiology
- Previously established principles/guidelines for ARDS (e.g. ARDSnet guidelines) didn't always fit well to COVID-19 patients

Please comment below if there are any other factors that are not mentioned and fit in the overall theme and where you would rank them in terms of influence compared to the existing factors above:

**13. Contextual factors**

**The following factors pertain to "Contextual factors"**

**30. Rank the following statements in order of its influence on your decision making: ***

- Feeling powerless to alter patient's trajectory (clinical impotence)
- Cognitive overload
- Desensitisation to acuity of patients
- Limited human and physical resources (forcing more conservative decision-making)

Please comment below if there are any other factors that are not mentioned and fit in the overall theme and where you would rank them in terms of influence compared to the existing factors above:

**14. Team factors**

**The following factors pertain to "Team factors"**

**31. Rank the following statements in order of its influence on your decision making: ***

- Familiarity of the team with managing sick ARDS patients (even in non-COVID-19 patients)
- Discussing COVID-19 ARDS pathophysiology and/or management with colleagues
- Team-based (distributed) decision making (cons, juniors, nurses together)
- Strong team work / team spirit
- Poor training on ARDSnet guidance/protocol

Please comment below if there are any other factors that are not mentioned and fit in the overall theme and where you would rank them in terms of influence compared to the existing factors above:

**15. Environmental factors**

**The following factors pertain to "Environmental factors"**

**32. Rank the following statements in order of its influence on your decision making: ***

- Ward layout and patient location (barriers to contact / PPE)
- Working patterns affecting decisions (e.g. fatigue = negative / getting to know the patient = positive)
- Unfamiliarity with multiple different ventilators

Please comment below if there are any other factors that are not mentioned and fit in the overall theme and where you would rank them in terms of influence compared to the existing factors above:

**16. Ranking themes**

**We will now like you to rank the different themes.**

As a reference, the factors pertaining to each theme are listed below:

1. Team factors

- Strong team-work/spirit
- Discussing with colleagues
- Team-based decision making
- Familiarity of the team managing sick ARDS patients
- Poor training on ARDSnet guidance/protocol

2. Environmental factors:

- Unfamiliarity with multiple different ventilators
- Ward layout/patient location
- Working patterns affecting decisions

3. Disease factors

- Previous guidelines didn’t fit
- Lack of consensus about ventilation
- Unfamiliarity with COVID pathophysiology
- Fear that making active decisions would worsen outcomes when facing uncertainty

4. Contextual factors influencing decision making:

- Limited human and physical resources
- Cognitive overload
- Desensitisation to acuity of patients
- Feeling powerless to alter patient’s trajectory

**33. Based on your experience working in the ITU and treating critically ill COVID-19 patients between March 2020 to March 2021, rank the following themes in order of its influence on your decision making ***

- Contextual factors
- Environmental factors
- Disease factors
- Team factors

Please comment below if there are any other themes that are not mentioned and where you would rank them in terms of influence compared to the existing themes above:

**17. Comments/Thoughts**

34. If you have any further comments/thoughts on the influences to decision making around ventilation strategies for critically ill COVID-19 patients with ARDS or on the questionnaire as a whole then please state these below:

| **Theme** | **Subtheme** | **Number of codes** | **Number of respondents** |
| --- | --- | --- | --- |
| **Existing themes** |  |  |  |
|  | C: Clinical impotence | 7 | 7 |
|  | C: Cognitive overload | 13 | 13 |
|  | C: Desensitisation | 2 | 2 |
|  | C: Limited human and physical resources | 15 | 15 |
|  | E: Unfamiliarity with equipment | 11 | 11 |
|  | T: Good teamwork | 4 | 4 |
|  | T: Local collaboration | 7 | 7 |
|  | T: Team based decision making | 5 | 5 |
|  | T: Experience of team members | 15 | 15 |
| **Themes relating to uncertainty in disease** |  |  |  |
|  | COVID-19 ARDS as a novel syndrome | 104 | 104 |
|  | Evidence/Experience | 51 | 51 |
|  | Sharing information | 20 | 20 |
| **New themes** |  |  |  |
|  | C: Emotional response to COVID-19 | 9 | 9 |
|  | C: Physical exertion | 2 | 2 |
|  | C: Logistical/organisational difficulty | 2 | 2 |
|  | T: Communication issues due to PPE | 2 | 2 |
|  | T: Team Composition | 11 | 11 |
|  | T: Conflict within and between teams | 10 | 10 |
|  | T: Pressure to conform to general concensus | 4 | 4 |
|  | Individual characteristics | 5 | 5 |

Table S4 Table showing the number of codes within each theme (existing themes, themes relating to uncertainty in disease, new) and subtheme. T, C and E represent team, contextual and environmental factors, respectively

|  | All | N |
| --- | --- | --- |
| **Age (range)** | 41 (23-64) | 203 |
| **Gender** |  | 203 |
| Male | 76 (37%) |  |
| Female | 118 (58%) |  |
| **Profession** |  | 202 |
| Doctor | 56 (28%) |  |
| Nurse | 120 (59%) |  |
| Physio/Respiratory Therapist | 21 (10%) |  |
| **ICU Experience** |  | 185 |
| 0 to 4 years | 71 (38%) |  |
| 5 to 9 years | 21 (11%) |  |
| 10 + years | 93 (50%) |  |
| **Experience of non-COVID-19 ARDS** |  | 137 |
| A lot | 57 (42%) |  |
| Some | 45 (33%) |  |
| Only a little | 19 (14%) |  |
| None | 16 (12%) |  |
| **Knowledge of national ARDS guidelines prior to 2020** |  | 136 |
| Aware and knew the content | 76 (56%) |  |
| Aware but didn’t know the content | 36 (26%) |  |
| Was not sure they existed | 24 (18%) |  |
| **Adherence to national ARDS guidelines prior to 2020** |  | 117 |
| Adherent | 64 (55%) |  |
| Rarely or somewhat adherent | 29 (32%) |  |
| Never adherent | 9 (13%) |  |

Table S5 Demographic of incomplete responses from UK, Italy, Germany and Netherlands

| **Theme** | **Questions asked** | **All** | **N** |
| --- | --- | --- | --- |
| **Certainty** | Total Certainty Score | **11 (7-15)** | **76** |
|  | Patients were presenting in ways that were consistent with my previous knowledge/experience of non-COVID-19 ARDS | 4 (2-6) |  |
|  | The disease course was similar to my previous experience/knowledge of other viral pneumonia | 3 (2-5) |  |
|  | The existing guidelines/protocols for managing non-COVID 19 ARDS was applicable to this situation | 4 (2-7) |  |
| **Deviation** | **Total Deviation Score** | **19.5 (14-23)** | **76** |
|  | Patients were presenting in ways that required more deviation from the ARDS management guidelines compared to my usual practice of non-COVID-19 ARDS | 7 (5-8) |  |
|  | Patients were presenting in ways that meant using non-standard ventilatory strategies was necessary | 7 (5-9) |  |
|  | Patients were presenting in ways that meant using non-standard ventilatory strategies could improve patient outcome | 6 (3-8) |  |
| **Confidence** | **Pooled Confidence** | **10 (5-14)** | **61** |
|  | I was confident that I had sufficient knowledge/experience to treat COVID-19 ARDS | 5 (2-7) |  |
|  | I was confident that my ventilatory strategy for COVID-19 ARDS would improve patient outcome | 5 (2-7) |  |

Table S6 Median scores on participants’ perception of COVID-19 ARDS presentation, management and confidence in decision-making (minimum score: 3, maximum score: 30) from incomplete responses. The Interquartile ranges are included in parentheses. The aggregated presentation, management and confidence scores are in bold.

**References**

1. Stern C, Lizarondo L, Carrier J, Godfrey C, Rieger K, Salmond S, et al. Methodological guidance for the conduct of mixed methods systematic reviews. JBI Evid Synth. 2020;18(10):2108-18.

2. Noblit GW, Hare RD. Meta-ethnography: synthesizing qualitative studies, vol. 11. California: Sage Publications; 1988.

3. Sattar R, Lawton R, Panagioti M, Johnson J. Meta-ethnography in healthcare research: a guide to using a meta-ethnographic approach for literature synthesis. BMC Health Serv Res. 2021;21(1):50.

4. Hong QN, Gonzalez-Reyes A, Pluye P. Improving the usefulness of a tool for appraising the quality of qualitative, quantitative and mixed methods studies, the Mixed Methods Appraisal Tool (MMAT). J Eval Clin Pract. 2018;24(3):459-67.

5. Munro SA, Lewin SA, Smith HJ, Engel ME, Fretheim A, Volmink J. Patient adherence to tuberculosis treatment: a systematic review of qualitative research. PLoS Med. 2007;4(7):e238.

6. France EF, Uny I, Ring N, Turley RL, Maxwell M, Duncan EAS, et al. A methodological systematic review of meta-ethnography conduct to articulate the complex analytical phases. BMC Med Res Methodol. 2019;19(1):35.
